# Supplementary material for: Efficient heavy metal ion removal by triazinyl-β-cyclodextrin functionalized iron nanoparticles
Source: Royal Society of Chemistry journal article supplement (doi:10.1039/c5ra15134a), 2015-01-01
Supplement: c5ra15134a1.pdf [file c5ra15134a1.pdf]

## Supplementary Information (SI)

### Efficient heavy metal ion removal by triazinyl- $\beta$ -cyclodextrin functionalized iron nanoparticles

Amir Abdolmaleki<sup>a,b,c</sup>\*, Shadpour Mallakpour<sup>a,b,c</sup>\*, Sedigheh Borandeh<sup>a</sup>

<sup>a</sup>Organic Polymer Chemistry Research Laboratory, Department of Chemistry, Isfahan University of Technology, Isfahan, 84156-83111, I. R. Iran;

<sup>b</sup>Nanotechnology and Advanced Materials Institute, Isfahan University of Technology, Isfahan, 84156-83111, I. R. Iran;

<sup>c</sup>Center of Excellence in Sensors and Green Chemistry, Department of Chemistry, Isfahan University of Technology, Isfahan, 84156-83111, I. R. Iran

#### Figure Caption of Fig. S1

**Fig. S1** The adsorption isotherms of the heavy metals with the as-prepared T- $\beta$ -CD-MNP.

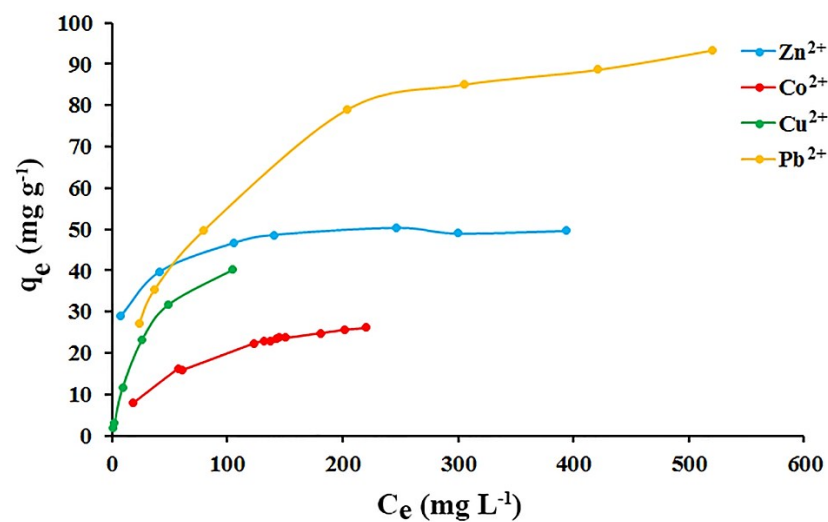

**Fig. S1** The adsorption isotherms of the heavy metals with the as-prepared T-β-CD-MNP.
